# Supplementary material
Source: Research Square preprint supplement (doi:10.21203/rs.3.rs-9983833/v1)
Supplement: Supplementary file 1 [file a3b330ab1f7fd8e0fcdc441d.pdf]

## Supplementary Information

Supplementary Table 1: Criteria and scoring scheme for expert audit of numerical (mechanical properties and composition) and textual (processing route) fields.

| Attribute | Dimension   | Scoring Rule                                                                                                                                                                                                                                                                                                 | Score Range |
|-----------|-------------|--------------------------------------------------------------------------------------------------------------------------------------------------------------------------------------------------------------------------------------------------------------------------------------------------------------|-------------|
| Numerical | Property    | 1 point if YS, UTS, and EL perfectly match the source;<br>0 points if any field is missing or incorrect.                                                                                                                                                                                                     | 0 or 1      |
| Numerical | Composition | 1 point if percentages of 36 elements perfectly match;<br>0 points if any field is missing or incorrect.                                                                                                                                                                                                     | 0 or 1      |
| Textual   | Processing  | 1.0: Complete steps, correct sequence, and faithful semantics.<br>0.8: Minor missing of non-essential information.<br>0.6: Slight sequence deviation without affecting understanding.<br>0.2–0.4: Significant omissions or excessive simplification.<br>0: Content contradicts the source or is untraceable. | 0 to 1      |

Supplementary Table 2: Consistency scoring rules for benchmarking automated extraction against manual records.

| Dimension      | Sub-item           | Max Score  | Scoring Rules                                                                                                                                                                                                         | Objective                                |
|----------------|--------------------|------------|-----------------------------------------------------------------------------------------------------------------------------------------------------------------------------------------------------------------------|------------------------------------------|
| Coverage       | Total Coverage     | 40         | 0: No corresponding candidate found.<br>20: Weak match (similar content, missing key attributes).<br>30: Clear correspondence (all key attributes covered).<br>40: Strong match (high consistency across all fields). | Detect if manual records are recovered.  |
| Accuracy       | Properties         | 20         | 20: Numerical values (YS, UTS, EL) perfectly match manual records.<br>0: Any discrepancy or missing value.                                                                                                            | Evaluate numerical recovery quality.     |
| Accuracy       | Composition        | 20         | 20: Elements, symbols, and ratios perfectly match manual records after normalization.<br>0: Incorrect symbols or inconsistent ratios.                                                                                 | Evaluate extraction and standardization. |
| Accuracy       | Process            | 20         | 20: Complete steps, correct conditions, and semantic consistency in manufacturing routes.<br>0: Significant omissions or incorrect parameters.                                                                        | Evaluate natural language recovery.      |
| <b>Overall</b> | <b>Total Score</b> | <b>100</b> | <b>Total = Coverage (40) + Accuracy (60).</b><br>Scores $\geq 80$ are defined as <i>high-confidence matches</i> .                                                                                                     | Integrated assessment.                   |

Supplementary Table 3: Literature search strategy. Search parameters for corpus retrieval (2000–2026).

| Parameter               | Description                                                                                                                                                |                                        |                                      |
|-------------------------|------------------------------------------------------------------------------------------------------------------------------------------------------------|----------------------------------------|--------------------------------------|
| Search period           | 2000 – 2026 (publication year)                                                                                                                             |                                        |                                      |
| Search fields           | Title or abstract                                                                                                                                          |                                        |                                      |
| Databases               | <b>Elsevier</b> (via APIs, full-text access)                                                                                                               |                                        |                                      |
| Total retained articles | 18,019 DOI-traceable metallurgical articles (after duplicate removal, metadata validation, full-text availability screening and steel-relevance filtering) |                                        |                                      |
| Keywords                | <b>Steel-specific terms (85+):</b>                                                                                                                         |                                        |                                      |
|                         | CFB Steel                                                                                                                                                  | Aluminum-Silicon Coated                | Wear-Resistant Steel                 |
|                         | Carbide-Free Bainitic Steel                                                                                                                                | Hot-Stamped Steel                      | Creep-Resistant Steel                |
|                         | Nanostructured Bainitic Steel                                                                                                                              | Alloyed Steel                          | Heat-Resistant Steel                 |
|                         | Low-Temperature Bainitic Steel                                                                                                                             | Low-Alloy Steel                        | Cryogenic Steel                      |
|                         | Super Bainitic Steel                                                                                                                                       | High-Strength Low-Alloy Steel          | Electrical Steel                     |
|                         | Bainitic Ferrite Steel                                                                                                                                     | Steel                                  | Silicon Steel                        |
|                         | Austempered Bainitic Steel                                                                                                                                 | HSLA Steel                             | Additively Manufactured Steel        |
|                         | Advanced High-Strength Steel                                                                                                                               | Microalloyed Steel                     | 3D-Printed Steel                     |
|                         | AHSS                                                                                                                                                       | Ultrahigh-Strength Steel               | Laser Powder Bed Fusion Steel        |
|                         | Third-Generation Advanced High-Strength Steel                                                                                                              | UHSS                                   | Directed Energy Deposition Steel     |
|                         | 3rd Gen AHSS                                                                                                                                               | Tool Steel                             | Steel                                |
|                         | Dual-Phase Steel                                                                                                                                           | Bearing Steel                          | Gradient Nanostructured Steel        |
|                         | DP Steel                                                                                                                                                   | Spring Steel                           | Nanocrystalline Steel                |
|                         | Transformation-Induced Plasticity Steel                                                                                                                    | Stainless Steel                        | Ultrafine-Grained Steel              |
|                         | TRIP Steel                                                                                                                                                 | Austenitic Stainless Steel             | Heterostructured Steel               |
|                         | Twinning-Induced Plasticity Steel                                                                                                                          | Ferritic Stainless Steel               | Laminated Steel                      |
|                         | TWIP Steel                                                                                                                                                 | Martensitic Stainless Steel            | Clad Steel                           |
|                         | Quenching and Partitioning Steel                                                                                                                           | Duplex Stainless Steel                 | Composite Steel                      |
|                         | Q&P Steel                                                                                                                                                  | Super Duplex Stainless Steel           | Medium-Entropy Steel                 |
|                         | Quenched and Tempered Steel                                                                                                                                | Maraging Steel                         | High-Entropy Steel                   |
|                         | Martensitic Steel                                                                                                                                          | Precipitation-Hardened Steel           | Compositionally Complex Steel        |
|                         | Tempered Martensitic Steel                                                                                                                                 | PH Steel                               | Lightweight Steel                    |
|                         | Hot-Stamped Steel                                                                                                                                          | Age-Hardened Steel                     | Low-Density Steel                    |
|                         | Press-Hardened Steel                                                                                                                                       | Secondary-Hardening Steel              | Fe-Mn-Al-C Steel                     |
|                         | Boron Steel                                                                                                                                                | Oxide-Dispersion-Strengthened Steel    | Fe-Mn-Si Steel                       |
|                         |                                                                                                                                                            | ODS Steel                              | Fe-Cr-Ni Steel                       |
|                         |                                                                                                                                                            | Hydrogen-Resistant Steel               | Fe-Co-Ni Steel                       |
|                         |                                                                                                                                                            | Hydrogen-Embrittlement-Resistant Steel | Fe-Cr-Mn-Ni Steel                    |
|                         |                                                                                                                                                            | Hydrogen-Storage Steel                 |                                      |
|                         |                                                                                                                                                            | Corrosion-Resistant Steel              |                                      |
|                         |                                                                                                                                                            | <b>General materials terms (45+):</b>  |                                      |
|                         |                                                                                                                                                            | metallic materials                     | superalloys                          |
|                         | metals and alloys                                                                                                                                          | nickel-based alloys                    | precipitation-strengthened alloys    |
|                         | engineering alloys                                                                                                                                         | cobalt-based alloys                    | age-hardenable alloys                |
|                         | structural metals                                                                                                                                          | titanium alloys                        | dispersion-strengthened alloys       |
|                         | ferrous alloys                                                                                                                                             | aluminum alloys                        | oxide-dispersion-strengthened alloys |
|                         | iron-based alloys                                                                                                                                          | magnesium alloys                       | additively manufactured metals       |
|                         | advanced metallic materials                                                                                                                                | copper alloys                          | additively manufactured alloys       |
|                         | structural alloys                                                                                                                                          | bulk metallic glasses                  | laser powder bed fusion alloys       |
|                         | lightweight alloys                                                                                                                                         | metal matrix composites                | directed energy deposition alloys    |
|                         | high-strength alloys                                                                                                                                       | nanostructured alloys                  |                                      |
|                         | corrosion-resistant alloys                                                                                                                                 | ultrafine-grained metals               |                                      |
|                         | wear-resistant alloys                                                                                                                                      | metals                                 |                                      |
|                         | heat-resistant alloys                                                                                                                                      | gradient nanostructured                |                                      |
|                         | creep-resistant alloys                                                                                                                                     | metals                                 |                                      |
|                         | refractory alloys                                                                                                                                          | heterostructured                       |                                      |
|                         |                                                                                                                                                            | materials                              |                                      |
|                         |                                                                                                                                                            | multi-principal-element alloys         |                                      |
|                         |                                                                                                                                                            | MPEAs                                  |                                      |
|                         |                                                                                                                                                            | high-entropy alloys                    |                                      |
|                         |                                                                                                                                                            | high-entropy alloys (HEA)              |                                      |
|                         |                                                                                                                                                            | medium-entropy alloys                  |                                      |
|                         |                                                                                                                                                            | compositionally complex alloys         |                                      |
|                         |                                                                                                                                                            | refractory                             |                                      |
|                         |                                                                                                                                                            | high-entropy alloys                    |                                      |
|                         |                                                                                                                                                            | lightweight                            |                                      |
|                         |                                                                                                                                                            | high-entropy alloys                    |                                      |
|                         |                                                                                                                                                            | eutectic high-entropy alloys           |                                      |

Note: Only articles with at least one keyword in title or abstract and published after 2000 were considered.

Supplementary Table 4: Fixed element set for composition vector alignment. The 36 chemical elements used for composition vector alignment.

| No. | Element | Remarks    |
|-----|---------|------------|
| 1   | H       | Hydrogen   |
| 2   | B       | Boron      |
| 3   | C       | Carbon     |
| 4   | N       | Nitrogen   |
| 5   | O       | Oxygen     |
| 6   | F       | Fluorine   |
| 7   | Na      | Sodium     |
| 8   | Mg      | Magnesium  |
| 9   | Al      | Aluminium  |
| 10  | Si      | Silicon    |
| 11  | P       | Phosphorus |
| 12  | S       | Sulfur     |
| 13  | Cl      | Chlorine   |
| 14  | Ca      | Calcium    |
| 15  | Ti      | Titanium   |
| 16  | V       | Vanadium   |
| 17  | Cr      | Chromium   |
| 18  | Mn      | Manganese  |
| 19  | Fe      | Iron       |
| 20  | Co      | Cobalt     |
| 21  | Ni      | Nickel     |
| 22  | Cu      | Copper     |
| 23  | Zn      | Zinc       |
| 24  | As      | Arsenic    |
| 25  | Y       | Yttrium    |
| 26  | Zr      | Zirconium  |
| 27  | Nb      | Niobium    |
| 28  | Mo      | Molybdenum |
| 29  | Sn      | Tin        |
| 30  | Sb      | Antimony   |
| 31  | La      | Lanthanum  |
| 32  | Ce      | Cerium     |
| 33  | Ta      | Tantalum   |
| 34  | W       | Tungsten   |
| 35  | Pb      | Lead       |
| 36  | Bi      | Bismuth    |

Supplementary Table 5: Metallurgy-aware validation rules and tolerances. Key validation rules for numerical fields.

| Field            | Acceptable range | Logical consistency              |
|------------------|------------------|----------------------------------|
| UTS / YS (MPa)   | 0 – 3000         | $YS \leq UTS$                    |
| Elongation (%)   | 0 – 100          | –                                |
| Element (wt.%)   | 0 – 100          | $\text{sum} \approx 100 \pm 5\%$ |
| Temperature (°C) | –273 – 2000      | –                                |
| Time (min/h)     | > 0              | –                                |

*Note:* All values are converted to standard units (MPa, %, °C, min/h) with a tolerance  $\leq 0.1\%$  after conversion.

Supplementary Table 6: Hyperparameters for deduplication and record selection. Similarity thresholds and weights.

| Parameter | Value | Description                           |
|-----------|-------|---------------------------------------|
| $\alpha$  | 0.6   | Weight for composition similarity     |
| $\tau$    | 0.85  | Composite similarity threshold        |
| $\lambda$ | 0.7   | Confidence vs. completeness trade-off |

## Supplementary Methods 1: Complete prompt template and extraction instructions

You are an expert in materials-science information extraction. You will receive the text of one DOI-traceable steel-related paper, its bibliographic metadata, and tables parsed from the paper in JSON format. Extract experimentally reported steel material-state records that link material identity, chemical composition, processing route and mechanical properties.

Return only a valid JSON object with the following top-level structure:

```
{
  "records": [
    {
      "source": {
        "doi": "...",
        "title": "...",
        "year": null
      },
      "material": {
        "material_name": "...",
        "grade_name": null,
        "state_or_condition": null
      },
      "composition": [
        {
          "element": "C",
          "value": 0.20,
          "unit": "wt.%",
          "evidence": "..."
        }
      ],
      "processing_route": {
        "process_description": "...",
        "ordered_steps": [
          {
            "step_type": "solution treatment",
            "temperature_C": 900,
            "time": 30,
            "time_unit": "min",
            "deformation": null,
            "atmosphere_or_cooling": "water quench",
            "evidence": "..."
          }
        ]
      },
      "mechanical_properties": {
        "YS": {"value": null, "unit": "MPa", "evidence": null},
        "UTS": {"value": null, "unit": "MPa", "evidence": null},
        "EL": {"value": null, "unit": "%", "evidence": null}
      },
      "provenance": {
        "section_or_table": "...",
        "evidence_spans": ["..."]
      }
    }
  ]
}
```

```
]
}
```

Extraction rules:

1. Extract one record for each experimentally reported material state, not merely for each article. A material state is defined by material identity, composition, processing condition and measured mechanical properties.
2. Use the DOI provided in the metadata exactly as the source DOI for every extracted record.
3. Extract only values supported by the supplied text or tables. Do not infer, estimate or complete missing values from external knowledge.
4. Use null for missing, uncertain or unsupported record-level fields. Do not fill unreported composition elements with 0 during extraction; zero filling is applied only later during composition-vector alignment.
5. Standardize units where the conversion is explicit and unambiguous: strengths to MPa, elongation to %, temperature to degree Celsius, and time to min or h. If a numerical value lacks a confirmable unit, set that field to null.
6. Preserve evidence spans for numerical values and processing descriptions whenever the source text or table provides localized evidence.
7. Reconstruct processing routes as ordered steps. Include temperatures, times, deformation levels, cooling methods and atmospheres when reported. Resolve vague pronouns such as "the sample" to the specific material or condition when the context supports it.
8. If a table is referenced by text, integrate the table values directly into the corresponding record rather than writing phrases such as "as shown in Table".
9. Return valid JSON only. Do not include explanations, markdown, comments or text outside the JSON object.

Input metadata:

```
{metadata}
```

Input text:

```
{text}
```

Input tables:

```
{tables}
```

In the actual execution, `{metadata}` was replaced with bibliographic metadata including DOI, `{text}` with the raw text of the target paper, and `{tables}` with the JSON representation of tables extracted from that paper. The prompt was provided to each LLM exactly as shown above.
